# Supplementary material for: Identification and application of exogenous dsRNA confers plant protection against Sclerotinia sclerotiorum and Botrytis cinerea
Source: PubMed Central journal article supplement (PMC5943259; doi:10.1038/s41598-018-25434-4), 2018-05-09
Supplement: 41598_2018_25434_MOESM1_ESM.pdf [file 41598_2018_25434_MOESM1_ESM.pdf]

## **Supplementary file**

**Identification and application of exogenous dsRNA confers plant protection against *Sclerotinia sclerotiorum* and *Botrytis cinerea***

Austein G Mcloughlin, Nick Wytinck, Philip L Walker, Ian J Girard, Khalid Y. Rashid, Teresa de Kievit, WG Dilantha Fernando, Steve Whyard, and Mark F Belmonte

**Table S1.** Mapping summary for all biological replicates of *in-vitro* and *in-planta* samples. Raw RNA-sequencing reads trimmed using Trimmomatic 0.33 and aligned to the *S. sclerotiorum* genome using TopHat v2.1.0.

|                          | in-vitro<br>(1) | in-vitro<br>(2) | in-vitro<br>(3) | ZY821<br>24hpi (1) | ZY821<br>24hpi (2) | ZY821<br>24hpi (3) | Westar<br>24hpi (1) | Westar<br>24hpi (2) | Westar<br>24hpi (3) |
|--------------------------|-----------------|-----------------|-----------------|--------------------|--------------------|--------------------|---------------------|---------------------|---------------------|
| <b>Trimmed<br/>reads</b> | 6537111         | 6339049         | 11826235        | 31473436           | 44428372           | 20453088           | 40287633            | 37020385            | 52025758            |
| <b>Mapped<br/>reads</b>  | 5388394         | 5216455         | 10273216        | 6282525            | 6724081            | 3061161            | 7810054             | 6478810             | 8125640             |
| <b>%<br/>Mapped</b>      | 82.4            | 82.3            | 86.9            | 20                 | 15.1               | 15                 | 19.4                | 17.5                | 15.6                |

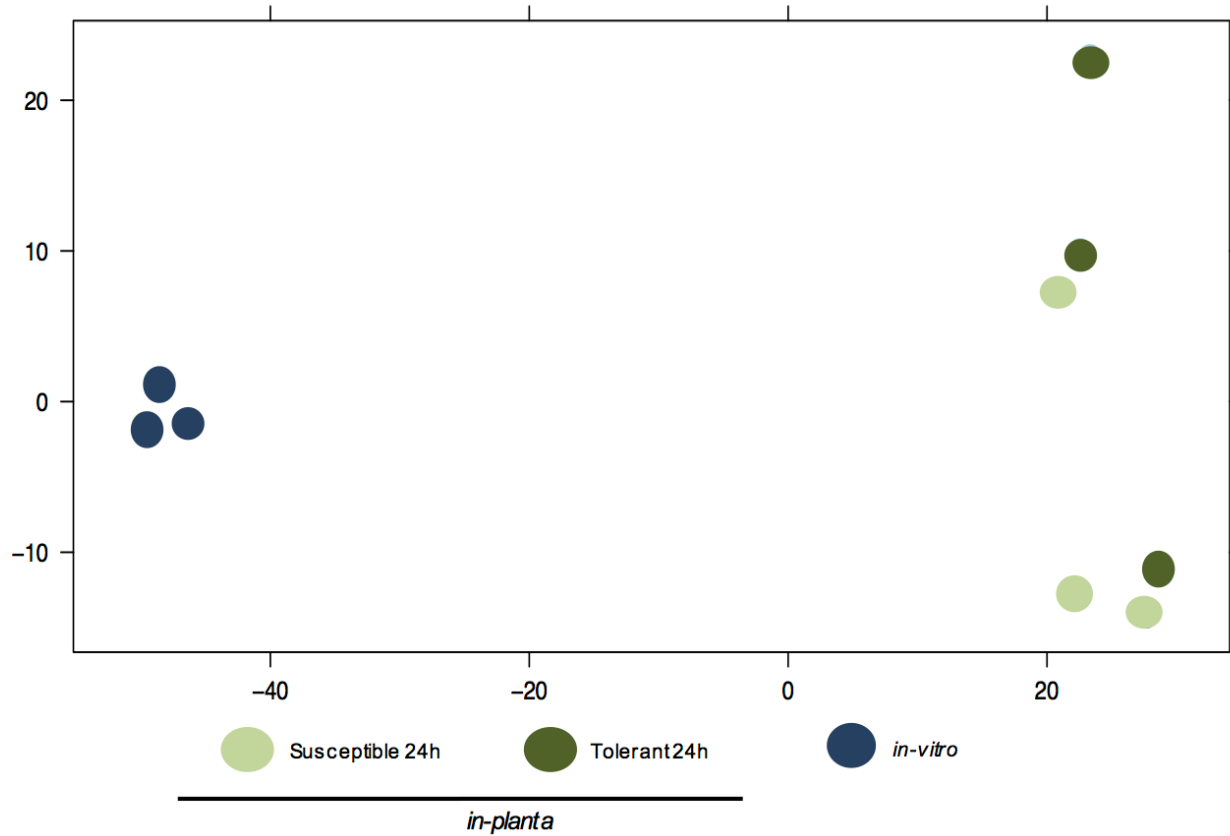

**Figure S1.** Principle component analysis plot of *in-planta* and *in-vitro* grown *S. sclerotiorum* based on FPKM transcript expression.

**Table S2.** Target identification pipeline guidelines for selecting targets to control phytopathogenic fungi using RNAi

| <b>Criteria</b>                                 | <b>Choose</b>                                                                                                                                               | <b>Avoid</b>                                                                                                                         |
|-------------------------------------------------|-------------------------------------------------------------------------------------------------------------------------------------------------------------|--------------------------------------------------------------------------------------------------------------------------------------|
| <b>RNA-seq dataset</b>                          | Upregulated genes common amongst infection conditions                                                                                                       | Down regulated genes in response to infection                                                                                        |
| <b>Essential Genes</b>                          | Genes of closely related species. Genes can be found in the Database of Essential Genes <sup>1</sup>                                                        | Essential genes from distant or unrelated relatives                                                                                  |
| <b>Biological processes</b>                     | Mitochondria, ROS response, protein modification, pathogenicity factors, transcription, splicing, protein modification, translation, cell wall modification | General growth, transcription factors, transport, electron carriers, signal transduction, pigment synthesis, carbohydrate metabolism |
| <b>Expression levels</b>                        | FPKM values between 1 and 500                                                                                                                               | Lowly (FPKM <1) and Highly (FPKM > 500) expressed during infection                                                                   |
| <b>Log2-fold change (control vs. infection)</b> | Fold changes between -0.5 and 4                                                                                                                             | Fold changes below -0.5 and above 4                                                                                                  |
| <b>Transcript length</b>                        | Above 200 nucleotides                                                                                                                                       | Below 200 nucleotides                                                                                                                |
| <b>Gene location</b>                            | Nuclear-encoded                                                                                                                                             | Organelle-encoded                                                                                                                    |
| <b>Redundancy</b>                               | Single function or without homologues                                                                                                                       | Genes with multiple homologues and functionally similar roles                                                                        |
| <b>Regulation</b>                               |                                                                                                                                                             | Genes that are heavily regulated                                                                                                     |

(1) [www.essentialgene.org](http://www.essentialgene.org) <sup>1</sup>

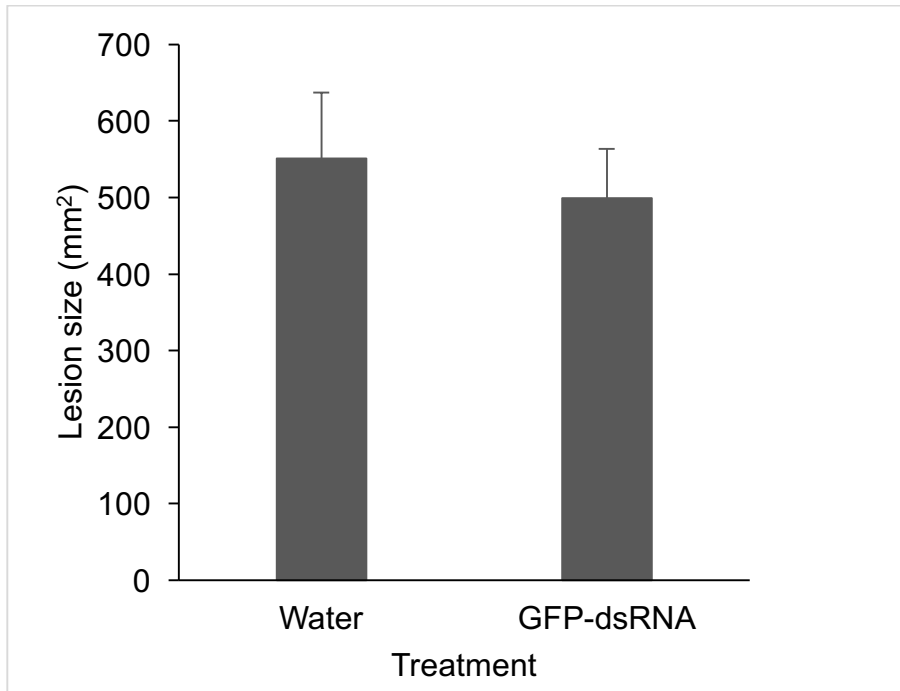

**Figure S2** *Sclerotinia sclerotiorum* infection on *B. napus* leaves ( $n = 10$ ) 2 dpi after treatment of water or GFP-dsRNA. No significant difference was observed ( $p = 0.63$ , student's *t*-test).

## References

1. Luo, H., Lin, Y., Gao, F., Zhang, C. T. & Zhang, R. DEG 10, an update of the database of essential genes that includes both protein-coding genes and noncoding genomic elements. *Nucleic Acids Res.* **42**, 574–580 (2014).
